# Supplementary material for: Effects of a combined therapy of bortezomib and ionizing radiation on chondrosarcoma three-dimensional spheroid cultures
Source: PubMed Central journal article supplement — Oncol Lett. 2021 Mar 30;21(6):428. doi: 10.3892/ol.2021.12689 (PMC8045153; doi:10.3892/ol.2021.12689), 2021-03-30
Supplement: Supplementary_Data1.pdf [file Supplementary_Data1.pdf]

Table SI. Sequencing coverage and quality statistics of the AmpliSeq RNA sequencing.

| Sample ID | Group    | Mapped reads, n | Amplicons, n | Total assigned amplicon reads, n | Reads on target, % | Assigned reads, % |
|-----------|----------|-----------------|--------------|----------------------------------|--------------------|-------------------|
| A7966-40  | 4Gy_1h   | 756,797         | 69           | 709,555                          | 99.60              | 93.76             |
| A7966-41  | 4Gy_1h   | 654,780         | 69           | 616,370                          | 99.61              | 94.13             |
| A7966-42  | ctrl_1h  | 507,944         | 69           | 463,823                          | 99.52              | 91.31             |
| A7966-43  | ctrl_1h  | 675,973         | 69           | 586,609                          | 99.29              | 86.78             |
| A7966-44  | 4Gy_4h   | 683,894         | 69           | 577,644                          | 98.14              | 84.46             |
| A7966-45  | 4Gy_4h   | 446,644         | 69           | 375,754                          | 97.83              | 84.13             |
| A7966-46  | ctrl_4h  | 708,778         | 69           | 638,887                          | 99.38              | 90.14             |
| A7966-47  | ctrl_4h  | 913,409         | 69           | 847,454                          | 99.54              | 92.78             |
| A7966-48  | 4Gy_24h  | 736,308         | 69           | 688,632                          | 99.60              | 93.52             |
| A7966-49  | 4Gy_24h  | 749,228         | 69           | 711,635                          | 99.56              | 94.98             |
| A7966-50  | ctrl_24h | 715,981         | 69           | 668,904                          | 99.50              | 93.42             |
| A7966-51  | ctrl_24h | 654,336         | 69           | 601,209                          | 99.45              | 91.88             |
| A7966-52  | ctrl_1h  | 795,798         | 69           | 736,394                          | 99.40              | 92.54             |
| A7966-53  | ctrl_1h  | 626,531         | 69           | 585,425                          | 99.49              | 93.44             |
| A7966-54  | 4Gy_1h   | 642,093         | 69           | 608,952                          | 99.44              | 94.84             |
| A7966-55  | 4Gy_1h   | 794,671         | 69           | 748,481                          | 99.42              | 94.19             |
| A7966-56  | ctrl_4h  | 740,168         | 69           | 695,039                          | 99.41              | 91.90             |
| A7966-57  | ctrl_4h  | 747,313         | 69           | 703,026                          | 99.41              | 94.07             |
| A7966-58  | 4Gy_4h   | 711,836         | 69           | 678,593                          | 99.41              | 95.33             |
| A7966-59  | 4Gy_4h   | 745,132         | 69           | 709,020                          | 99.44              | 95.15             |
| A7966-60  | ctrl_24h | 812,201         | 69           | 762,772                          | 99.56              | 93.91             |
| A7966-61  | ctrl_24h | 851,603         | 69           | 800,884                          | 99.53              | 94.04             |
| A7966-62  | 4Gy_24h  | 840,082         | 69           | 786,377                          | 99.64              | 93.61             |
| A7966-63  | 4Gy_24h  | 818,175         | 69           | 768,511                          | 66.62              | 93.93             |
